# Supplementary material
Source: MDPI journal article supplement (https://www.mdpi.com/2072-4292/14/11/2510)
Supplement: s1 [file s1]

# Supplementary Material

## Long-term Landsat-based monthly burned area for the Brazilian Biomes using Deep Learning

Ane A. C. Alencar, Vera L. S. Arruda, Wallace Vieira da Silva, Dhemerson E. Conciani, Diego Costa, Natalia Crusco, Soltan Galano Duverger, Nilson Clementino Ferreira, Washington da Franca-Rocha, Heinrich Hasenack, Luiz Felipe Moraes Martenexen, Valderli J. Piontekowski, Noely Vicente Ribeiro, Eduardo Reis Rosa, Marcos Reis Rosa, Sarah Moura B. dos Santos, Julia Shimbo, Eduardo Vélez-Martin

### 1. Classification regions

The classification regions were broadly defined based on ecological and land use contexts. For the ecological characteristics, we used an aggregation of the Ecoregions dataset based on edaphoclimatic and morphoclimatic data updated for 2017 [1]. For the land use context, we used the regions with concentration of deforestation and fires based on cumulative area deforested retrieved from MapBiomas Collection 6.0 Land use dataset [2] and Modis MCD64A1 [3]. Using these two criteria, the Amazon was divided in 3 large regions where the first one included the southern portion of the arc of deforestation where 90% of the deforestation and 82% fires in the region took place until 2020. It is also the driest areas of the region, encompassing 14 distinct ecoregions. The second Amazon region includes the Southwestern portion of the basin in Brazil, which is more humid but also with an important deforestation history (7% of the deforestation has affected this region and 10% of the average Amazon annual fire happened in this portion of the Amazon). This region was formed by 10 ecoregions. The third and last region for the Amazon is the least affected by fire and least deforested, it contains another fire pattern due to the presence of large patches of fire prone savannas in the northern portion of the region. It is formed by 12 ecoregions (Figure S1).

The Cerrado was defined into 5 regions based on the grouping of ecoregions produced by Sano et al. [4], and considering the degree of deforestation in different parts of the biome, the different fire pattern, and land use and land cover. The Caatinga biome was divided into 4 regions, considering the level 2 of hydrographic basins defined by the National Water Resources Plan (NWRP), which corresponds to the highest level of detail and considers the similarity in environmental conditions, such as soil type, vegetation and weather [5]. The Atlantic Forest was also divided into 4 regions (i) the region dominated by agriculture fields in the Southern portion of São Paulo State, (ii) the wetlands at the limit of Mato Grosso do Sul and Paraná states, (iii) the mining areas of Minas Gerais state and (iv) the Atlantic Forests in the Northeast region of Brazil [6]. The Pampa biome was divided into 3 regions considering the higher lands dominated by grassland fields and the lower lands with

rice production. The Pantanal biome was not divided into any region due to its smaller area and similar conditions in relation to ecological and land use patterns within the biome.

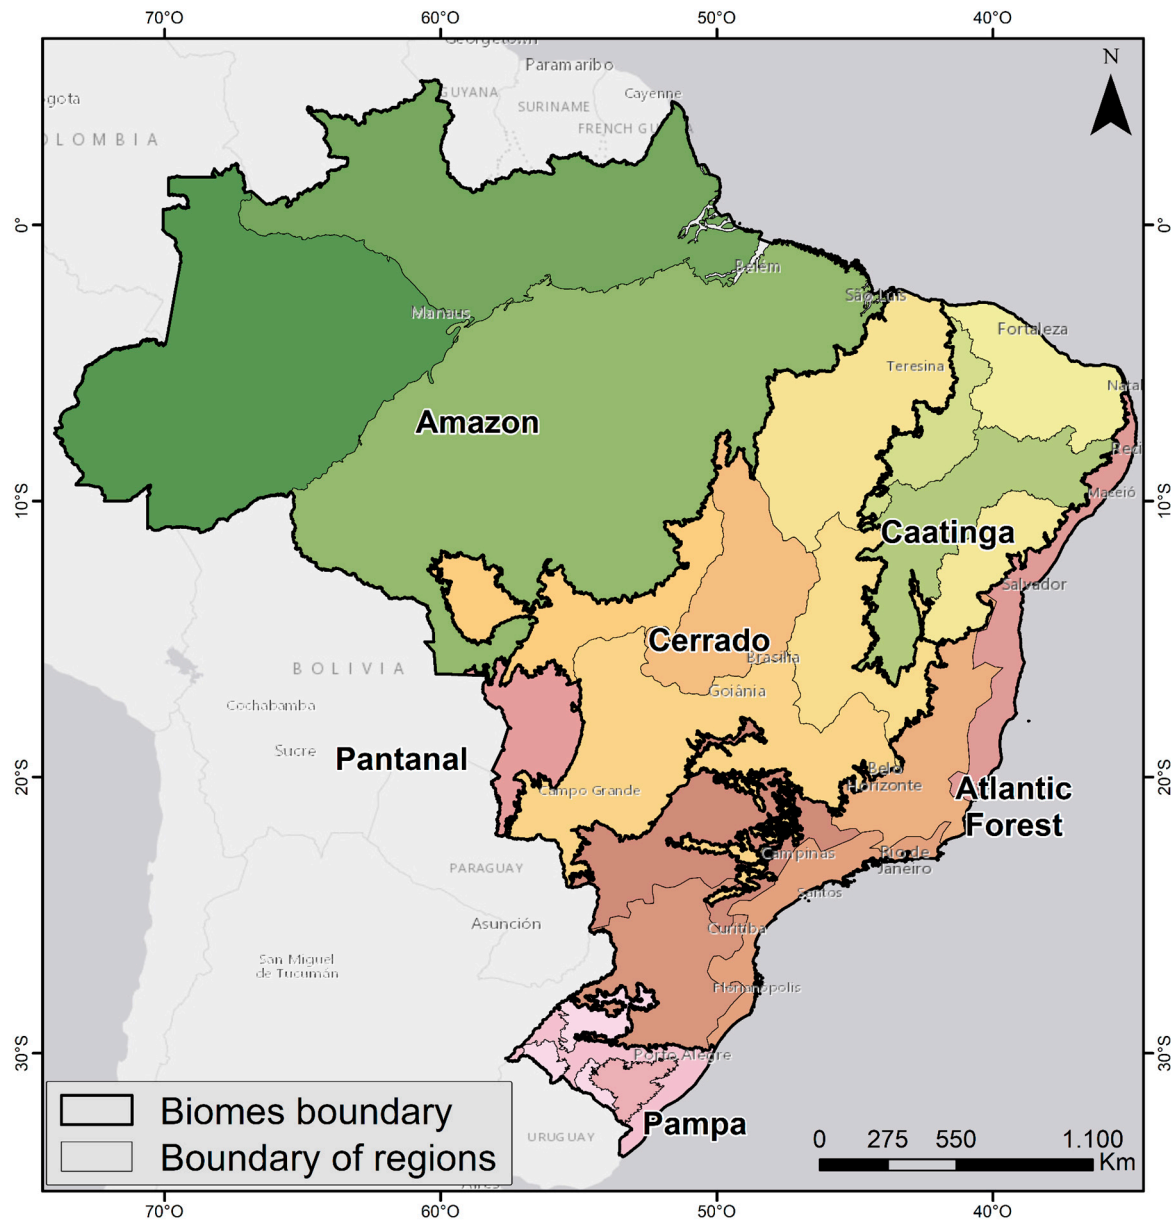

**Figure S1.** Regions defined for each biome in Brazil used to collect training samples and classify burned areas for MapBiomass Fire Collection 1.

## 2. Annual Landsat Mosaics

For the classification of burned areas and the distinction between burned and unburned areas, the following spectral bands of each Landsat sensor were selected and used to extract spectral information from the annual quality mosaics (Table S1).

**Table S1.** Landsat satellites spectral bands used as predictors for burned area classification.

| Spectral band     | Landsat 5 and 7 (1985 - 2012) |                             | Landsat 8 (2013 - 2020) |                             |
|-------------------|-------------------------------|-----------------------------|-------------------------|-----------------------------|
|                   | Band number                   | Bandwidth ( $\mu\text{m}$ ) | Band number             | Bandwidth ( $\mu\text{m}$ ) |
| Red               | 3                             | 0.63 - 0.69                 | 4                       | 0.64 - 0.67                 |
| NIR               | 4                             | 0.76 - 0.90                 | 5                       | 0.85 - 0.88                 |
| SWIR <sub>1</sub> | 5                             | 1.55 - 1.75                 | 6                       | 1.57 - 1.65                 |
| SWIR <sub>2</sub> | 7                             | 2.08 - 2.35                 | 7                       | 2.11 - 2.29                 |

The annual quality mosaic was built based on the extraction of spectral information of the pixel with the minimum NBR value from all the available images in a year. The spectral information was used to create a color composite mosaic highlighting the areas affected by fire within the year (Figure S2). The date of the pixel with minimum NBR was used to indicate the month in which the burn scar was detected (Figure S2 B to M).

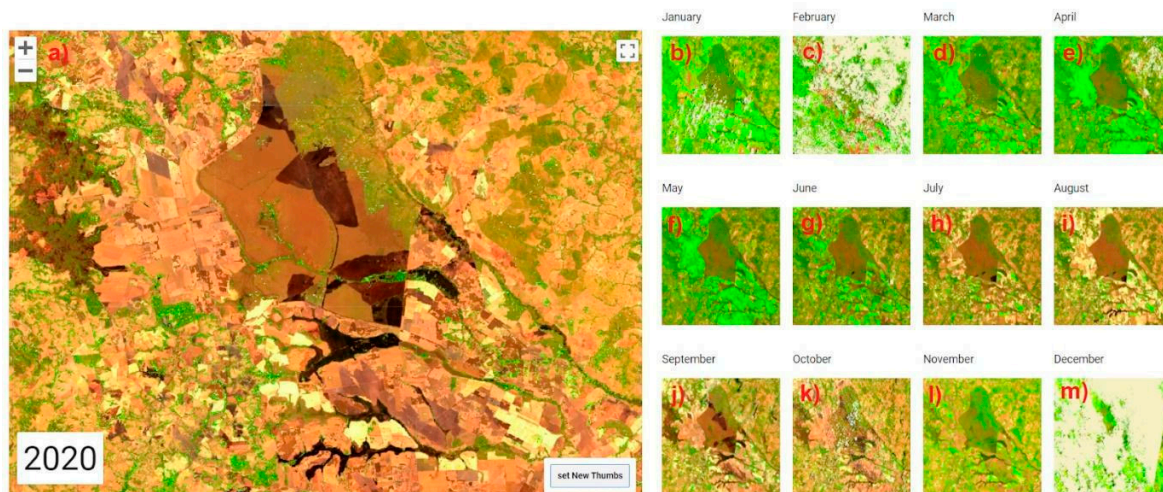

**Figure S2.** (A) Example of the annual quality mosaic (RGB SWIR-1, NIR, RED) created with spectral information retrieved from the minimum NBR pixels in a year used to perform the burned area classification. Note that this image addresses all the burned areas detected in the monthly mosaics from (B) January to (M) December.

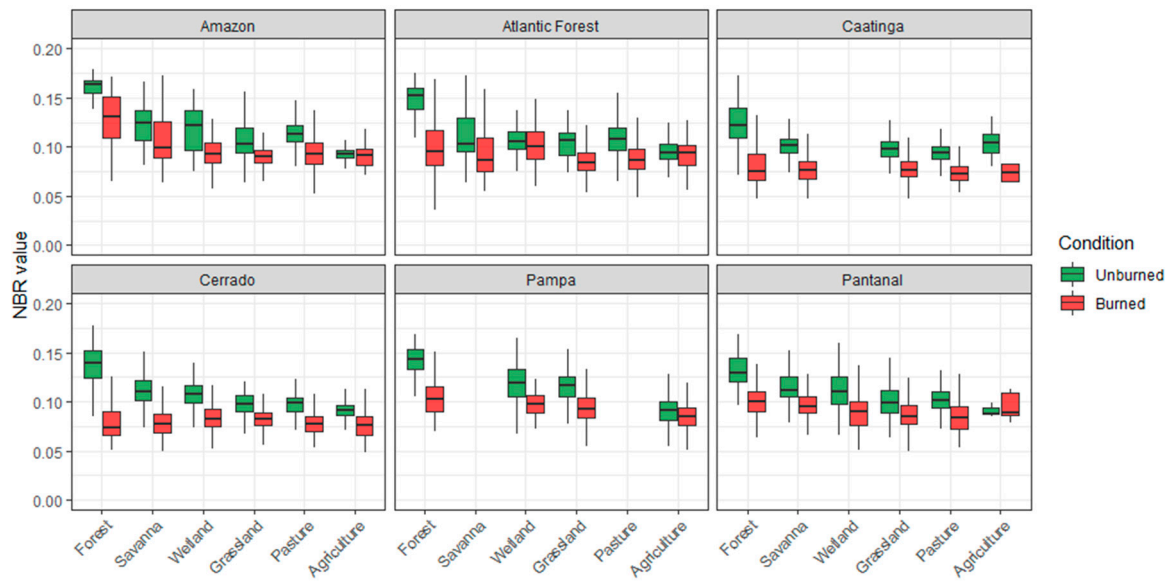

**Figure S3.** Variation of NBR value extracted from the quality mosaic between burned and unburned areas by land use and cover by biome. Burned (red boxes) represents the immediately post-fire reflectance values, and unburned (green boxes) represents the reflectance value in a specific year.

### 3. Sampling strategy

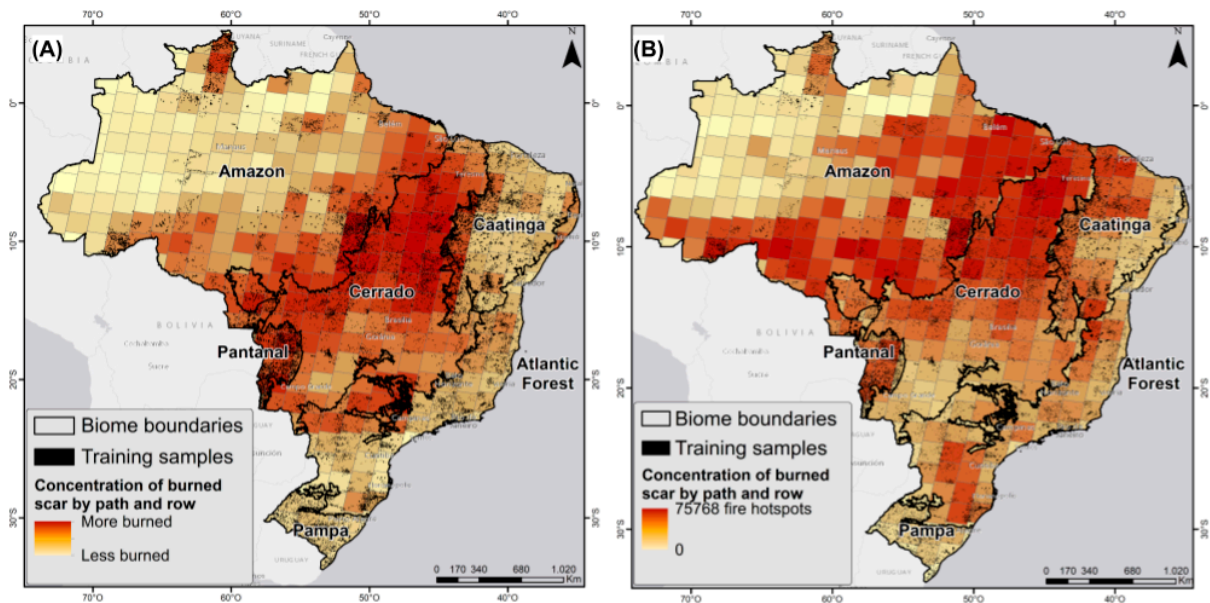

**Figure S4.** (A) Concentration of burned scar from the MCD64A1 Burned Area from 2000 to 2020 by Landsat path and row; and (B) concentration of active fire pixels from the AQUA\_M-T (Sensor MODIS) from 2000 to 2020 by Landsat path and row.

The Landsat annual quality mosaics were used to visually identify and extract burned and unburned training samples to compose the classification spectral library. The proportion of the samples collected and the number of the samples collected in different years are presented in Figure S5.

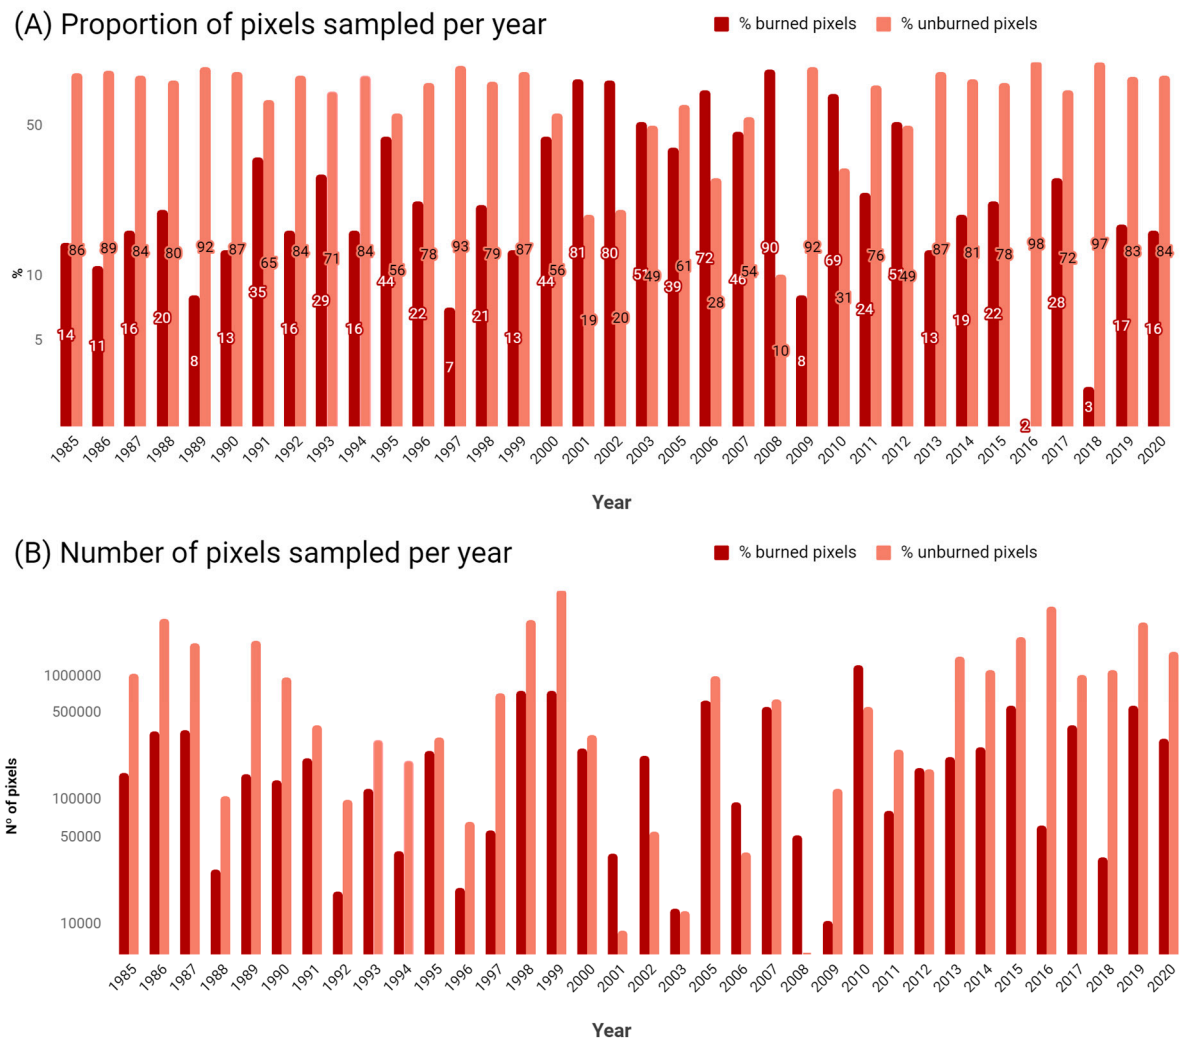

**Figure S5.** (A) Proportion of burned and unburned training pixels sampled by year; and (B) Number of burned and unburned training pixels sampled by year.

#### 4. Deep learning model

The model structure used for burned area classification was the Multi-Layer Perceptron Network (MLPN), which consists of several layers of interconnected computational units, where each node (neuron) in one layer is connected to a node in the next layer [7,8]. The layers are divided in three: input, hidden, and output layers (Figure S6).



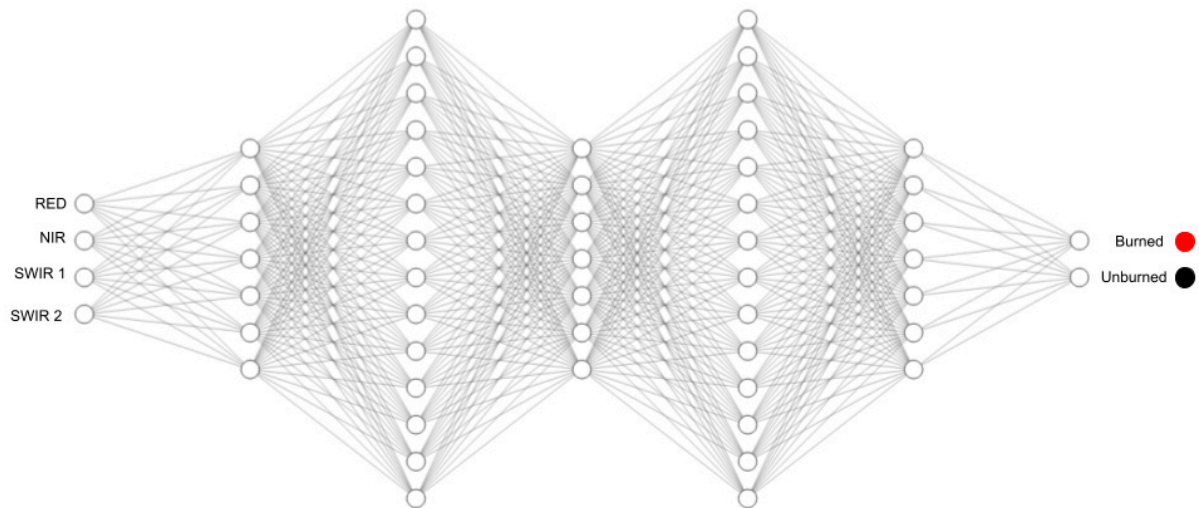

**Figure S6.** Architecture of the Multi-Layer Perceptron Network, where the input layers are the spectral bands (RED, NIR, SWIR1 and SWIR2) and the output layers are the classes burned and unburned.

**Table S2.** List of Google Earth Engine scripts used for the construction of annual quality mosaics, the collection of training samples, the classification of burned area, and the MapBiomas Collection 1 burned area dataset.

|                                | Script link                                                                                                                                                                                                                   |
|--------------------------------|-------------------------------------------------------------------------------------------------------------------------------------------------------------------------------------------------------------------------------|
| Construction of annual mosaics | <a href="https://code.earthengine.google.com/7f87f9da175eabfce854538d2ee0365f">https://code.earthengine.google.com/7f87f9da175eabfce854538d2ee0365f</a>                                                                       |
| Training samples collection    | <a href="https://code.earthengine.google.com/f2f1948e67fcea98ca731874a178ffa3">https://code.earthengine.google.com/f2f1948e67fcea98ca731874a178ffa3</a>                                                                       |
| Burned area classification     | <a href="https://projects.mapbiomas-workspace/public/collection6/mapbiomas-fire-collection1-annual-burned-coverage-1">projects/mapbiomas-workspace/public/collection6/mapbiomas-fire-collection1-annual-burned-coverage-1</a> |
| Annual burned area maps        | <a href="https://code.earthengine.google.com/b7acee0bff17a6bf2d1136695ed399bc">https://code.earthengine.google.com/b7acee0bff17a6bf2d1136695ed399bc</a>                                                                       |

## 5. Post Classification

**Table S3.** Classes of land use and cover used to mask and remove the committed errors of burned area mapping from the classification results by biome.

| Biome           | Water | Urban Area | Rocky Outcrop | Rice | Soybeans | Other Temporary Crops |
|-----------------|-------|------------|---------------|------|----------|-----------------------|
| Amazon          | X     | X          | X             |      |          |                       |
| Caatinga        | X     |            | X             |      |          |                       |
| Cerrado         | X     | X          |               |      |          |                       |
| Atlantic Forest | X     | X          |               | X    |          |                       |
| Pampa           | X     | X          |               | X    |          | X                     |
| Pantanal        | X     |            |               |      | X        | X                     |

## 6. Validation

For the validation of the burned area maps, samples were collected for each Biome in 2007, 2001 and 2019 (Table S4).

**Table S4.** Total sampling units (grid cells of 2 x 2 km) by biome and year used for validation.

| Year | Amazon | Caatinga | Cerrado | Atlantic Forest | Pampa | Pantanal | Total |
|------|--------|----------|---------|-----------------|-------|----------|-------|
| 2007 | 370    | 370      | 370     | 370             | 352   | 364      | 2196  |
| 2011 | 370    | 370      | 370     | 370             | 342   | 361      | 2183  |
| 2019 | 370    | 370      | 370     | 370             | 337   | 366      | 2183  |

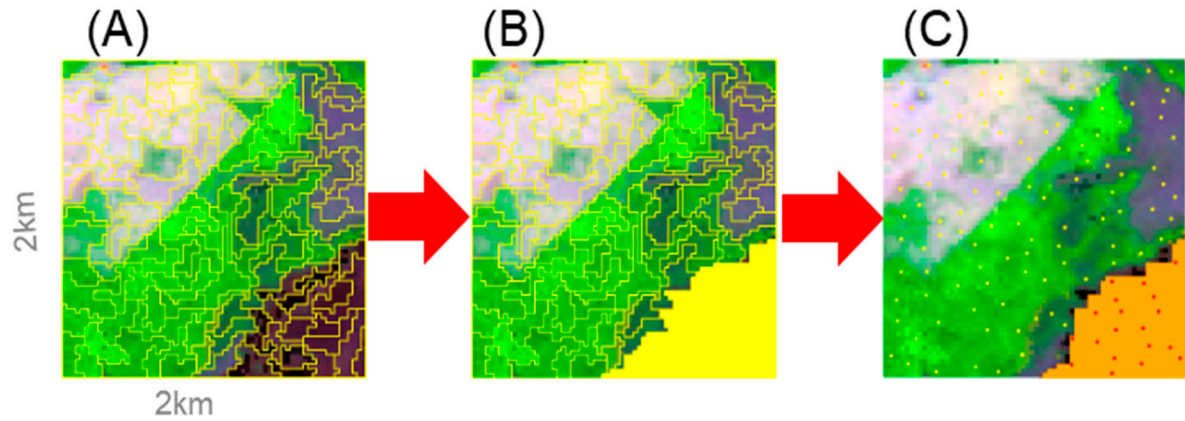

**Figure S7.** Strategy used to create the validation sampling dataset. (A) in a grid of  $2 \times 2$  km we run a segmentation routine, (B) the burned segments were selected manually and classified as burned (yellow polygon) and unburned; and (C) a centroid of each polygon was created and used to generate the final validation dataset.

A confusion matrix with the accuracy of burned area was produced by aggregating the accuracy from the biomes for all the three years validated (Table S5, S6 and S7), generating producer's and user's accuracy, and commission and omission errors. Because burned area is considered a rare class on the map when compared to unburned areas, we applied a weight to reduce the disparities among the size of burned and unburned areas.



**Table S5.** Confusion for the classification of burned area in Brazil for the year 2007 with user's accuracy, producer's accuracy, commission and omission errors.

|                        |          | Reference Data |           |        |         |
|------------------------|----------|----------------|-----------|--------|---------|
|                        |          | Burned         | Unburned  | Total  | Weight  |
| 2007<br>Classification | Burned   | 8041           | 811       | 8852   | 0,03241 |
|                        | Unburned | 1773           | 262473    | 264246 | 0,96759 |
| Total                  |          | 9814           | 263284    | 273098 |         |
| Burned                 |          | 248077,39      | 25020,61  | 273098 |         |
| Unburned               |          | 54699,81       | 271265,61 | 325965 |         |
| Total                  |          | 302777,20      | 296286,22 | 86,69  |         |
| Producer's accuracy    |          | 81,93          |           |        |         |
| Omission error (%)     |          | 18,07          |           |        |         |
| User's accuracy        |          | 90,84          |           |        |         |
| Commission error (%)   |          | 9,16           |           |        |         |

**Table S6.** Confusion for the classification of burned area in Brazil for the year 2011 with user's accuracy, producer's accuracy, commission and omission errors.

|                                 |                 | Reference Data |           |        |         |
|---------------------------------|-----------------|----------------|-----------|--------|---------|
|                                 |                 | Burned         | Unburned  | Total  | Weight  |
| <b>2011<br/>Classification</b>  | <b>Burned</b>   | 5933           | 398       | 6331   | 0,02389 |
|                                 | <b>Unburned</b> | 1118           | 257588    | 258706 | 0,97611 |
| <b>Total</b>                    |                 | 7051           | 257986    | 265037 |         |
| <b>Burned</b>                   |                 | 248375,38      | 16661,62  | 265037 |         |
| <b>Unburned</b>                 |                 | 46803,25       | 263891,64 | 310695 |         |
| <b>Total</b>                    |                 | 295178,63      | 280553,26 | 88,98  |         |
| <b>Producer's<br/>accuracy</b>  |                 | <b>84,14</b>   |           |        |         |
| <b>Omission<br/>error (%)</b>   |                 | <b>15,86</b>   |           |        |         |
| <b>User's<br/>accuracy</b>      |                 | <b>93,71</b>   |           |        |         |
| <b>Commission<br/>error (%)</b> |                 | <b>6,29</b>    |           |        |         |

**Table S7.** Confusion for the classification of burned area in Brazil for the year 2019 with user's accuracy, producer's accuracy, commission and omission errors.

|                        |          | Reference Data |           |        |         |
|------------------------|----------|----------------|-----------|--------|---------|
|                        |          | Burned         | Unburned  | Total  | Weight  |
| 2019<br>Classification | Burned   | 11703          | 610       | 12313  | 0,04763 |
|                        | Unburned | 1401           | 244791    | 246192 | 0,95237 |
| Total                  |          | 13104          | 245401    | 258505 |         |
| Burned                 |          | 245698,37      | 12806,63  | 258505 |         |
| Unburned               |          | 29413,26       | 257033,93 | 286447 |         |
| Total                  |          | 275111,63      | 269840,56 | 92,25  |         |
| Producer's accuracy    |          | 89,31          |           |        |         |
| Omission error (%)     |          | 10,69          |           |        |         |
| User's accuracy        |          | 95,05          |           |        |         |
| Commission error (%)   |          | 4,95           |           |        |         |

**Table S8.** Comparisons between mapping burned areas in individual scenes and the annual quality mosaic for 15 Landsat Path/Row sorted in the Amazon and border of Cerrado for the year 2015.

| Landsat Path/row | MapBiomas Fire annual quality mosaic mapping (km <sup>2</sup> ) | Landsat Individual scenes mapping (km <sup>2</sup> ) | Comparison between Individual scenes burned area mapping and quality mosaic |                                       |
|------------------|-----------------------------------------------------------------|------------------------------------------------------|-----------------------------------------------------------------------------|---------------------------------------|
|                  |                                                                 |                                                      | Mapped only in individual scenes (km <sup>2</sup> )                         | Coincident mapping (km <sup>2</sup> ) |
| 232/57           | 3.477                                                           | 3.507                                                | 30                                                                          | 3.477                                 |
| 232/58           | 2.658                                                           | 2.658                                                |                                                                             | 2.658                                 |
| 225/59           | 1.233                                                           | 1.237                                                | 4                                                                           | 1.233                                 |
| 225/60           | 425                                                             | 428                                                  | 4                                                                           | 425                                   |
| 222/61           | 1.271                                                           | 1.327                                                | 57                                                                          | 1.271                                 |
| 226/61           | 61                                                              | 72                                                   | 11                                                                          | 61                                    |
| 222/62           | 1.643                                                           | 1.732                                                | 89                                                                          | 1.643                                 |
| 226/62           | 35                                                              | 35                                                   | -                                                                           | 35                                    |
| 227/65           | 936                                                             | 951                                                  | 15                                                                          | 936                                   |
| 001/66           | 555                                                             | 559                                                  | 4                                                                           | 555                                   |
| 226/67           | 387                                                             | 387                                                  | -                                                                           | 387                                   |
| 229/67           | 886                                                             | 900                                                  | 14                                                                          | 886                                   |
| 002/67           | 561                                                             | 574                                                  | 13                                                                          | 561                                   |
| 224/68           | 4.855                                                           | 4.855                                                | -                                                                           | 4.855                                 |
| 231/68           | 140                                                             | 140                                                  | -                                                                           | 140                                   |
| <b>Total</b>     | <b>19.123</b>                                                   | <b>19.363</b>                                        | <b>240</b>                                                                  | <b>19.123</b>                         |

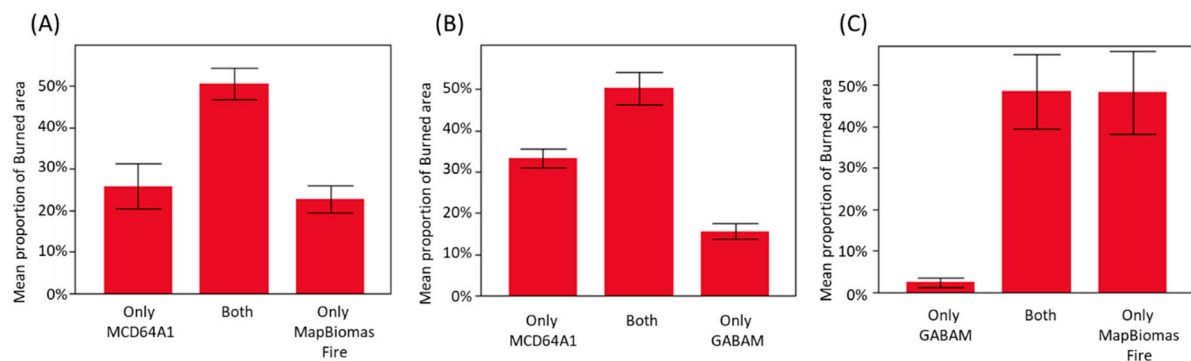

**Figure S8.** Mean proportion of area burned retrieved from the spatial comparison between Modis MCD64A1 burned area product [3], MapBiomas Fire Collection 1 burned area (this dataset), and GABAM burned area [9] for the year 2005, 2010, 2018. (A) mean burned area mapped only in MCD64A, mean burned area coincident in both MCD64A1 and MapBiomas Fire, and mean burned area mapped only in MapBiomas Fire; (B) mean burned area mapped only with MCD64A1, mean burned area coincident in both MCD64A1 and GABAM, and mean burned area mapped only in GABAM; (C) mean burned area mapped only in GABAM, mean burned area coincident in both GABAM and MapBiomas Fire, and mean burned area mapped only in MapBiomas Fire.

## 7. Annual variability of burned area by biome

**Table S9** Annual burned area (km<sup>2</sup>) by biome from 1985 to 2020.

| Annual area burned (km <sup>2</sup> ) |         |         |          |          |                 |       |         |
|---------------------------------------|---------|---------|----------|----------|-----------------|-------|---------|
| Years                                 | Cerrado | Amazon  | Pantanal | Caatinga | Atlantic Forest | Pampa | Brazil  |
| 1985                                  | 94,044  | 49,641  | 7,836    | 2,122    | 4,281           | 64    | 157,989 |
| 1986                                  | 86,100  | 44,254  | 12,181   | 6,114    | 6,317           | 59    | 155,024 |
| 1987                                  | 110,652 | 81,080  | 7,397    | 7,230    | 3,842           | 93    | 210,294 |
| 1988                                  | 113,873 | 73,468  | 11,943   | 3,430    | 5,191           | 154   | 208,059 |
| 1989                                  | 41,405  | 35,142  | 3,022    | 2,869    | 2,198           | 95    | 84,731  |
| 1990                                  | 56,853  | 43,600  | 6,161    | 4,793    | 2,768           | 143   | 114,318 |
| 1991                                  | 37,474  | 50,770  | 10,037   | 2,285    | 1,860           | 77    | 102,504 |
| 1992                                  | 39,159  | 49,085  | 3,083    | 6,042    | 909             | 34    | 98,311  |
| 1993                                  | 68,889  | 57,047  | 16,201   | 5,385    | 7,984           | 115   | 155,621 |
| 1994                                  | 73,596  | 53,936  | 6,355    | 4,100    | 5,147           | 59    | 143,194 |
| 1995                                  | 55,509  | 83,528  | 10,002   | 3,608    | 3,348           | 111   | 156,105 |
| 1996                                  | 72,443  | 68,797  | 8,691    | 3,330    | 3,238           | 190   | 156,689 |
| 1997                                  | 57,852  | 83,244  | 3,868    | 5,968    | 4,640           | 106   | 155,678 |
| 1998                                  | 118,613 | 89,624  | 5,481    | 4,880    | 2,645           | 52    | 221,295 |
| 1999                                  | 67,678  | 89,572  | 24,404   | 3,428    | 5,961           | 84    | 191,128 |
| 2000                                  | 49,150  | 66,301  | 5,118    | 3,200    | 3,020           | 169   | 126,958 |
| 2001                                  | 78,533  | 73,680  | 12,663   | 5,765    | 4,265           | 240   | 175,145 |
| 2002                                  | 79,654  | 85,315  | 15,662   | 4,491    | 3,517           | 164   | 188,803 |
| 2003                                  | 47,957  | 75,382  | 2,832    | 4,762    | 6,043           | 164   | 137,140 |
| 2004                                  | 62,999  | 98,274  | 6,496    | 5,616    | 2,146           | 102   | 175,633 |
| 2005                                  | 58,567  | 113,683 | 14,872   | 4,754    | 1,973           | 69    | 193,918 |
| 2006                                  | 34,332  | 77,987  | 2,469    | 486      | 2,516           | 55    | 119,845 |
| 2007                                  | 110,067 | 109,853 | 8,220    | 4,442    | 2,366           | 57    | 235,005 |
| 2008                                  | 47,913  | 80,394  | 4,213    | 4,296    | 2,414           | 40    | 139,270 |
| 2009                                  | 23,943  | 50,463  | 5,913    | 2,383    | 1,874           | 55    | 84,632  |
| 2010                                  | 108,470 | 82,741  | 6,476    | 3,360    | 2,974           | 46    | 204,066 |
| 2011                                  | 31,881  | 40,512  | 2,189    | 399      | 3,269           | 22    | 78,272  |
| 2012                                  | 94,233  | 44,726  | 8,929    | 5,977    | 2,219           | 78    | 156,161 |
| 2013                                  | 42,972  | 23,893  | 2,556    | 2,039    | 1,211           | 41    | 72,712  |
| 2014                                  | 75,737  | 44,669  | 1,598    | 2,770    | 2,115           | 36    | 126,926 |
| 2015                                  | 81,782  | 65,523  | 4,085    | 5,169    | 1,843           | 80    | 158,483 |
| 2016                                  | 66,299  | 45,524  | 7,381    | 3,594    | 2,307           | 88    | 125,194 |
| 2017                                  | 81,368  | 65,972  | 5,354    | 2,487    | 2,446           | 64    | 157,691 |
| 2018                                  | 38,227  | 35,406  | 1,603    | 3,111    | 1,433           | 60    | 79,840  |
| 2019                                  | 72,191  | 53,711  | 11,710   | 5,092    | 2,629           | 142   | 145,477 |
| 2020                                  | 61,586  | 51,489  | 22,922   | 4,044    | 2,096           | 120   | 142,257 |

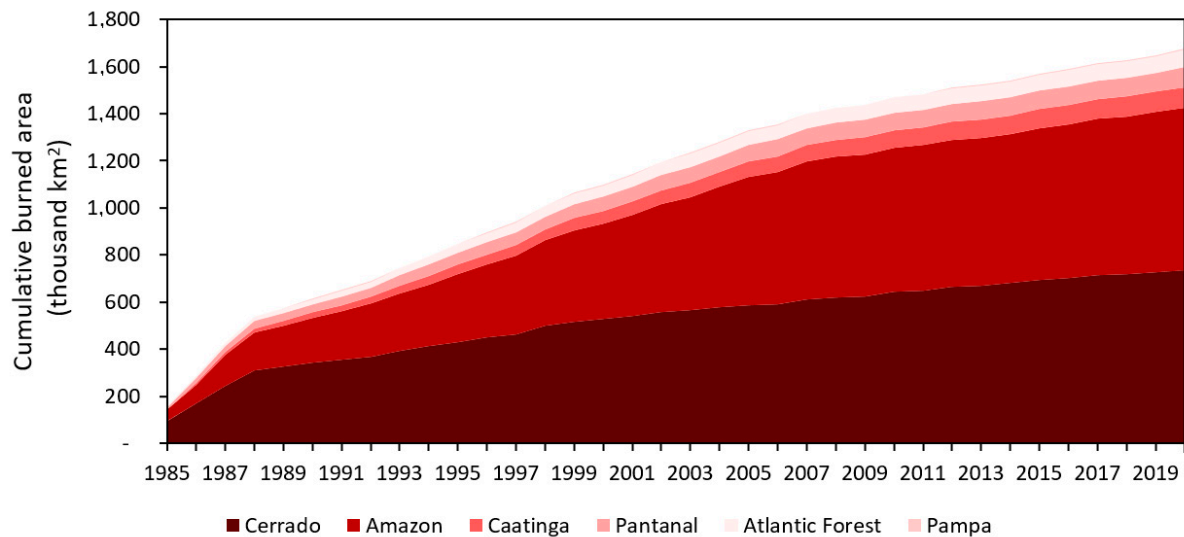

**Figure S9.** Cumulative burned area by biome from 1985 to 2020.

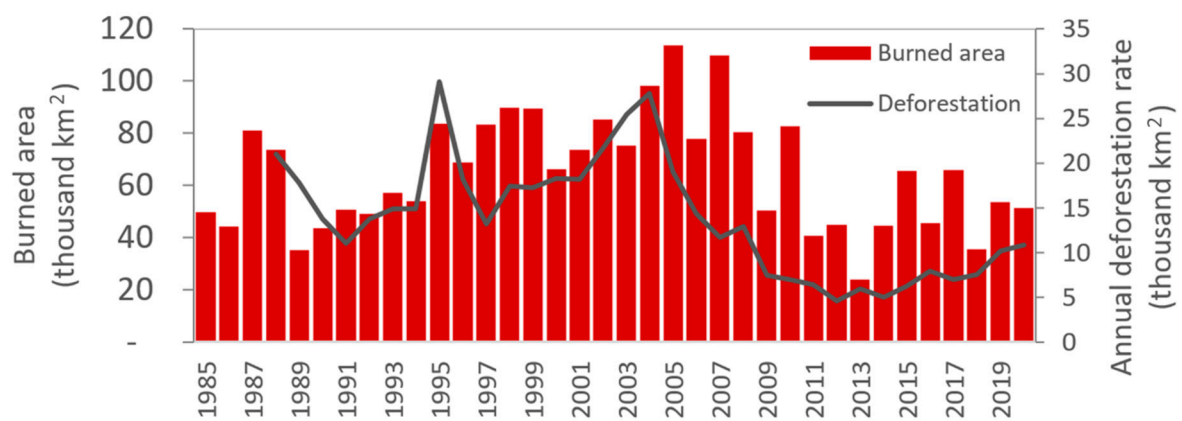

**Figure S10.** Distribution of annual burned area from MapBiomas Fire Collection 1 and annual deforestation rate from Prodes- INPE [10] for the Amazon biome.



## 8. Monthly burned area by biome

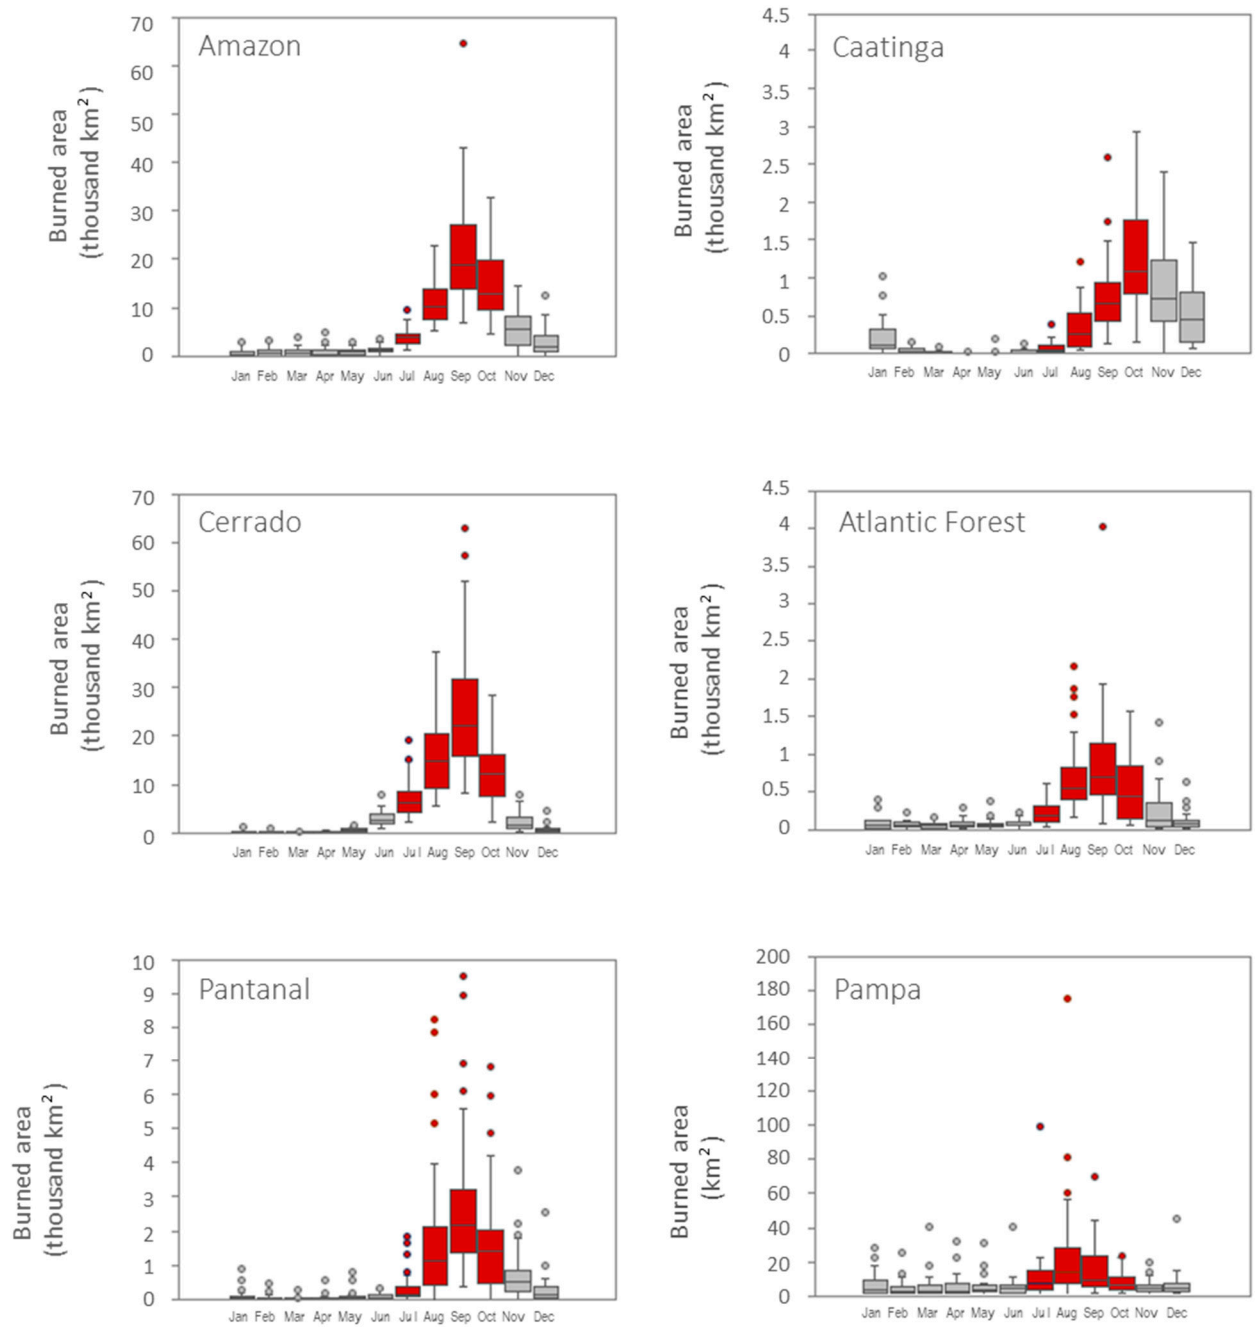

**Figure S11.** Seasonal patterns of fire events occurred within Brazil's biomes, considering variation in burned area per month, in the period (1985-2020). In red the fire season months from July to October.

## 9. Fire frequency

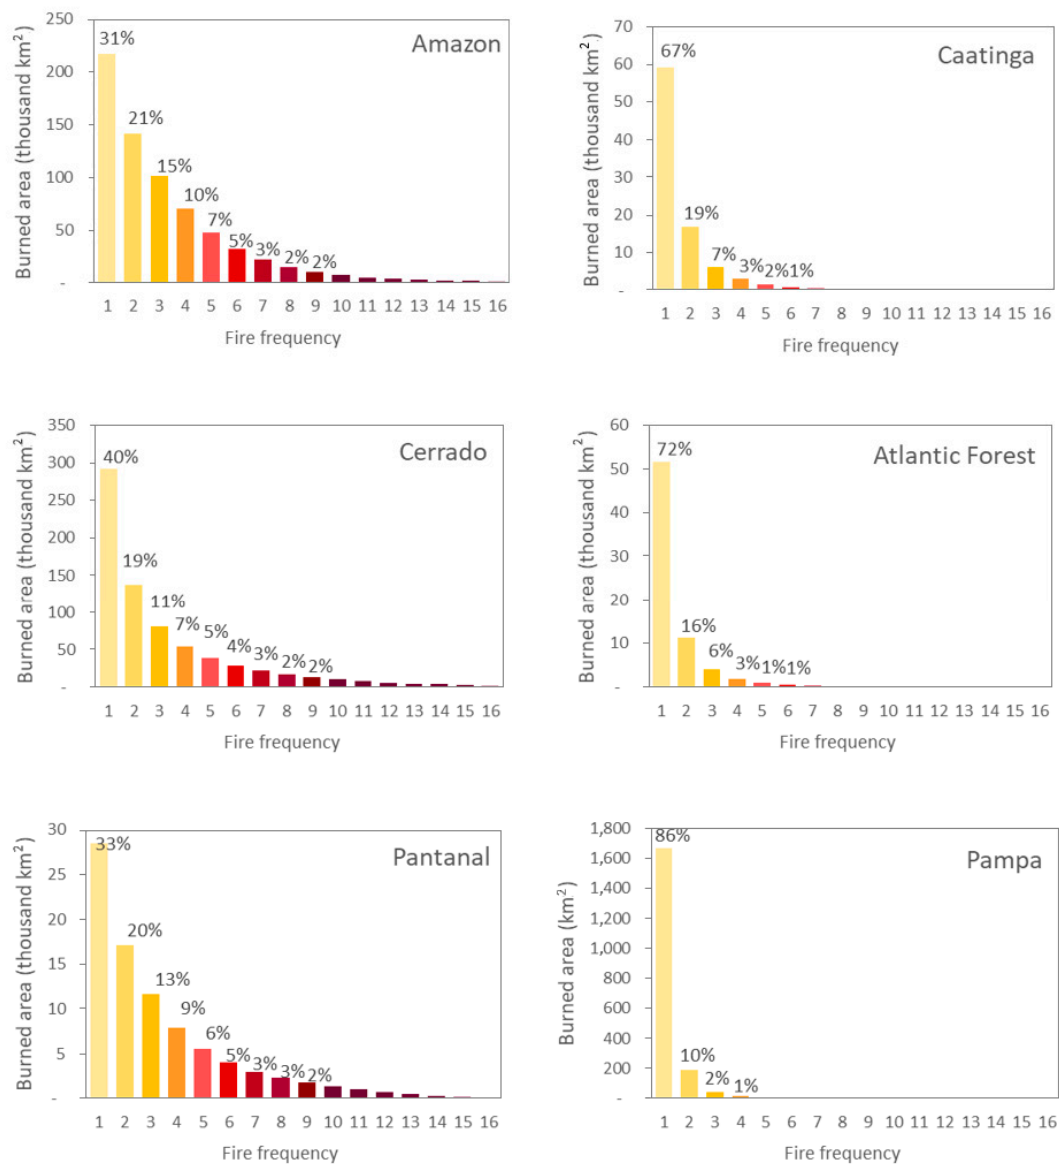

**Figure S12.** Frequency pattern of the burned area between the years 1985 to 2020 by Brazilian biome, and their respective proportion of burned area.

## 10. Burned area by land cover and land use

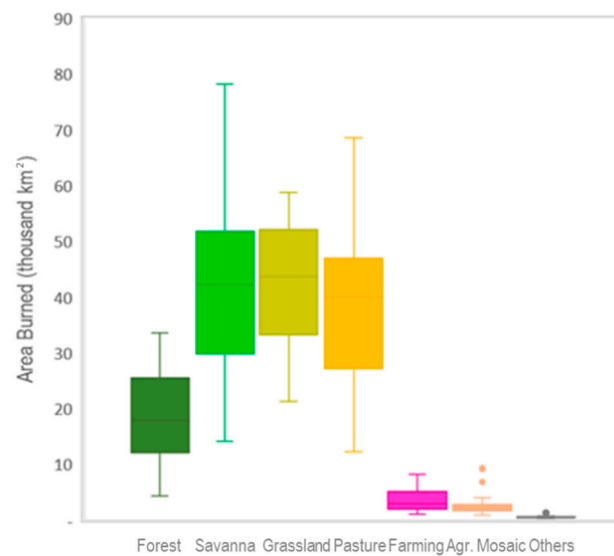

**Figure S13.** Variance on burned area by land cover and use for Brazil between 1985 and 2020.

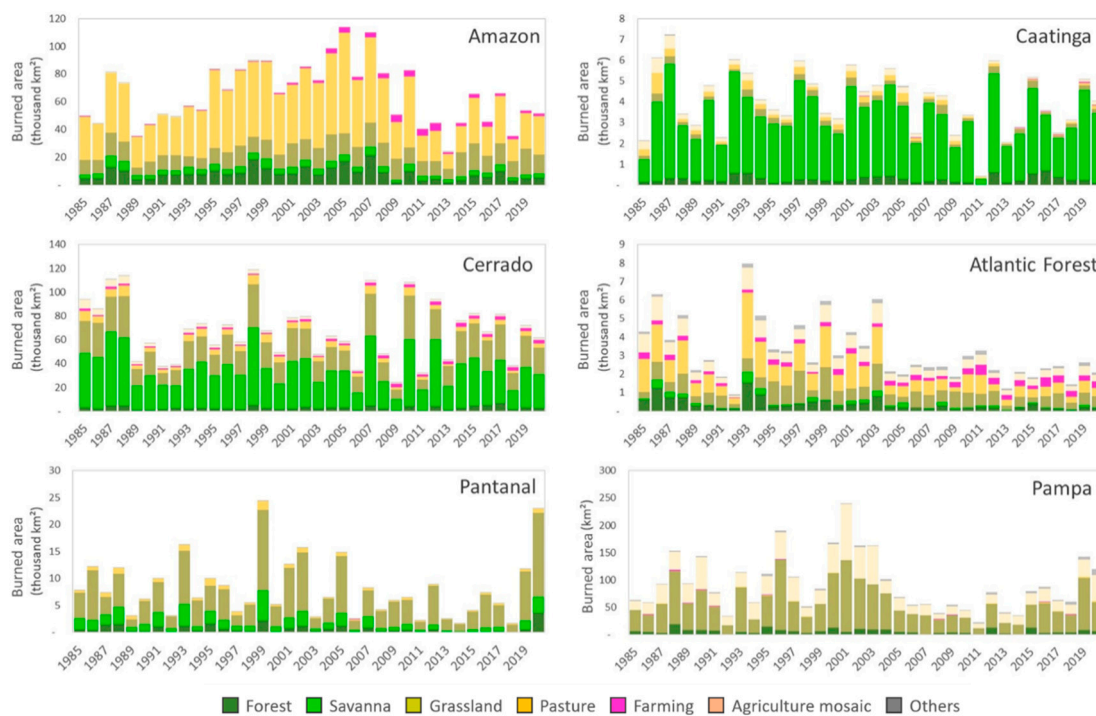

**Figure S14.** Annual distribution of burned area by land use and land cover by biome from 1985 to 2020.

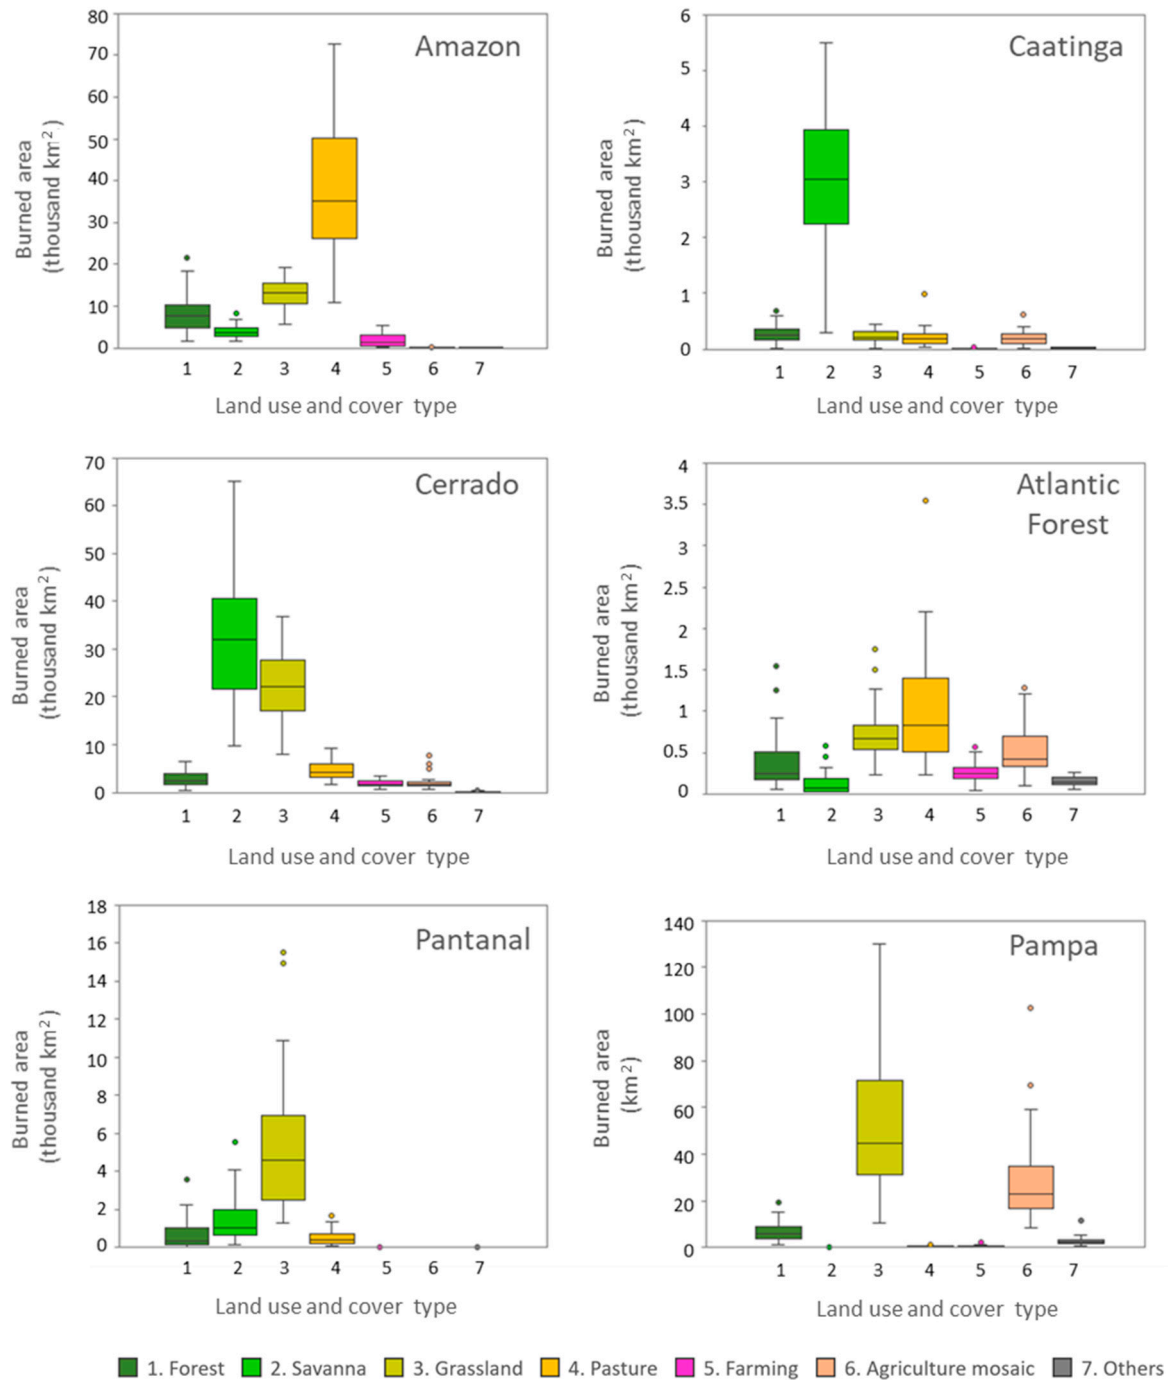

**Figure S15.** Variance of annual burned area by land use and cover classes from 1985 to 2020 for the Brazilian biomes.

## 11. References

1. Dinerstein, E.; Olson, D.; Joshi, A.; Vynne, C.; Burgess, N.D.; Wikramanayake, E.; Hahn, N.; Palminteri, S.; Hedao, P.; Noss, R.; et al. An Ecoregion-Based Approach to Protecting Half the Terrestrial Realm. *Bioscience* **2017**, *67*, doi:10.1093/biosci/bix014.
2. Mapbiomas Collection 6 of the Annual Series of Land Use and Land Cover Maps of Brazil 2021.
3. Giglio, L.; Boschetti, L.; Roy, D.P.; Humber, M.L.; Justice, C.O. The Collection 6 MODIS burned area mapping algorithm and product. *Remote Sens. Environ.* **2018**, *217*, 72–85, doi:10.1016/j.rse.2018.08.005.
4. Sano, E.E.; Rodrigues, A.A.; Martins, E.S.; Bettiol, G.M.; Bustamante, M.M.C.; Bezerra, A.S.; Couto, A.F.; Vasconcelos, V.; Schüller, J.; Bolfe, E.L. Cerrado ecoregions: A spatial framework to assess and prioritize Brazilian savanna environmental diversity for conservation. *J. Environ. Manage.* **2019**, *232*, 818–828, doi:10.1016/j.jenvman.2018.11.108.
5. Brasil *Plano de ação: estratégia nacional para o gerenciamento dos recursos hídricos 2022-2040*; Brasília, DF, 2022;
6. Rosa, M.R.; Brancalion, P.H.S.; Crouzeilles, R.; Tambosi, L.R.; Piffer, P.R.; Lenti, F.E.B.; Hirota, M.; Santiami, E.; Metzger, J.P. Hidden destruction of older forests threatens Brazil's Atlantic Forest and challenges restoration programs. *Sci. Adv.* **2021**, *7*, 1–9, doi:10.1126/sciadv.abc4547.
7. Hu, X.; Weng, Q. Remote Sensing of Environment Estimating impervious surfaces from medium spatial resolution imagery using the self-organizing map and multi-layer perceptron neural networks. *Remote Sens. Environ.* **2009**, *113*, 2089–2102, doi:10.1016/j.rse.2009.05.014.
8. Safi, Y.; Bouroumi, A. Prediction of Forest Fires Using Artificial Neural Networks Description of the proposed method Artificial neural networks. *Appl. Math. Sci.* **2013**, *7*, 271–286.
9. Long, T.; Zhang, Z.; He, G.; Jiao, W.; Tang, C.; Wu, B.; Zhang, X.; Wang, G.; Yin, R. 30m resolution global annual burned area mapping based on landsat images and Google Earth Engine. *Remote Sens.* **2019**, *11*, 1–30, doi:10.3390/rs11050489.
10. INPE *Monitoramento do Desmatamento da Floresta Amazônica Brasileira por Satélite*; São José dos Campos, SP, 2021; Available in: <http://www.obt.inpe.br/OBT/assuntos/programas/amazonia/prodes>
